1 **Secondary transmission of SARS-CoV-2 in educational settings in Northern Italy from September**  
2 **2020 to April 2021: a population-based study**

3 Authors:

4 Olivera Djuric<sup>1,2</sup>, Elisabetta Larosa<sup>3</sup>, Mariateresa Cassinadri<sup>3</sup>, Silvia Cilloni<sup>3</sup>, Eufemia Bisaccia<sup>3</sup>, Davide  
5 Pepe<sup>3</sup>, Massimo Vicentini<sup>1</sup>, Francesco Venturelli<sup>3</sup>, Laura Bonvicini<sup>1</sup>, Paolo Giorgi Rossi<sup>1</sup>, Patrizio  
6 Pezzotti<sup>4</sup>, Alberto Mateo Urdiales<sup>4</sup>, Emanuela Bedeschi<sup>3</sup>, and the Reggio Emilia Covid-19 Working  
7 Group.

8 Affiliations:

9 1) Epidemiology Unit, Azienda Unità Sanitaria Locale – IRCCS di Reggio Emilia, Reggio Emilia, Italy

10 2) Center for Environmental, Nutritional and Genetic Epidemiology (CREAGEN), Section of Public  
11 Health, Department of Biomedical, Metabolic and Neural Sciences, University of Modena and Reggio  
12 Emilia. Italy

13 3) Public health unit, Azienda Unità Sanitaria Locale – IRCCS di Reggio Emilia, Reggio Emilia, Italy

14 4) Department of Infectious Diseases, Istituto Superiore di Sanità, Rome, Italy.

15

16 The following are members of the Reggio Emilia Covid-19 Working Group:

17 Reggio Emilia Covid-19 Working Group: Massimo Costantini, Paolo Giorgi Rossi, Roberto Grilli,  
18 Massimiliano Marino, Debora Formisano, Giulio Formoso, Emanuela Bedeschi, Cinzia Perilli, Ivano  
19 Venturi, Eufemia Bisaccia, Elisabetta Larosa, Mariateresa Cassinadri, Silvia Cilloni, Cinzia Campari,  
20 Francesco Gioia, Serena Broccoli, Marta Ottone, Pierpaolo Pattacini, Giulia Besutti, Valentina Iotti,  
21 Lucia Spaggiari, Pamela Mancuso, Andrea Nitrosi, Marco Foracchia, Rossana Colla, Alessandro  
22 Zerbini, Marco Massari, Anna Maria Ferrari, Mirco Pinotti, Nicola Facciolongo, Ivana Lattuada, Laura  
23 Trabucco, Stefano De Pietri, Giorgio Francesco Danelli, Laura Albertazzi, Enrica Bellesia, Simone  
24 Canovi, Mattia Corradini, Tommaso Fasano, Elena Magnani, Annalisa Pilia, Alessandra Polese, Silvia  
25 Storchi Incerti, Piera Zaldini, Efrem Bonelli, Bonanno Orsola, Matteo Revelli, Carlo Salvarani,  
26 Francesco Venturelli.

27

28 Corresponding author:

29

30 Olivera Djuric, MD, PHD  
31 Epidemiology Unit  
32 Azienda USL-IRCCS di Reggio Emilia  
33 Via Amendola 2  
34 42122 Reggio Emilia, Italy  
35 Email: [olivera.djuric@ausl.re.it](mailto:olivera.djuric@ausl.re.it)  
36 Tel: +39/ 0522335278

37

38 **Abstract**

39 **Background:** We aimed to quantify the risk of transmission of SARS-CoV-2 in the school setting by  
40 type of school, characteristics of the index case and calendar period in the Reggio Emilia province  
41 (RE), Italy. The secondary aim was to estimate the promptness of contact tracing.

42 **Methods:** A population-based analysis of surveillance data of all COVID-19 cases occurring in RE,  
43 Italy, from September 1, 2020, to April 4th, 2021, for which a school contact and/or exposure was  
44 suspected. Indicator of the delay in contact tracing was computed as the time elapsed since  
45 positivity of the index case and the date on which the swab for classmates was scheduled (or most  
46 were scheduled).

47 **Results:** Overall, 30,184 and 13,608 contacts among classmates and teachers/staff, respectively,  
48 were identified and received recommendation for testing; 43,214 (98.7%) performed the test.  
49 Secondary transmission occurred in about 40% of the investigated classes, and the overall secondary  
50 case attack rate was 4%, slightly higher when the index case was a teacher, but with almost no  
51 differences by type of school and stable during the study period. Promptness of contact tracing  
52 increased during the study period, reducing the time from index case identification and testing of  
53 contacts from 7 to 3 days, as well the ability to identify possible source of infection in the index case.

54 **Conclusions:** Despite the spread of the Alpha variant during the study period in RE, the secondary  
55 case attack rate remained stable from school reopening in September 2020 until the beginning of  
56 April 2021.

57 **Key words:** SARS-CoV-2, COVID-19, schools, attack rate, contact tracing

58

59

## 60 **Background**

61 Since the first case of COVID-19 was described at the end of 2019, there have been almost 249  
62 million cases and 5 million deaths reported globally up to October 2021.<sup>1</sup> In the period prior to the  
63 implementation of mass vaccination programmes, social distancing and movement-restriction  
64 measures were the main measures undertaken to prevent virus transmission. Closure of educational  
65 institutions was one of the preventive measures considered and often adopted during the pandemic.  
66 This was due to the concern about potential school-to-home transmissions of the virus from  
67 students to more susceptible family members, although the overall risk of severe COVID-19 in  
68 children and young people was shown to be very small.<sup>2</sup>

69 The role of school contacts in the spread of the virus as well the effectiveness of school closures in  
70 controlling the epidemic have been debated, and inconsistent results have emerged.<sup>3,4</sup> Modelling  
71 studies have provided scenarios with a small impact of school closure on virus transmission under  
72 the conditions hypothesized by the authors.<sup>5,6,7</sup> A recent systematic review of empiric studies<sup>8</sup>  
73 showed heterogenous results ranging from no effect to an important reduction in virus transmission  
74 in the community, with studies with lower risk of bias showing a small effect.<sup>9,10</sup> Finally, three large  
75 studies from the US, the UK and Italy suggest a limited role of school transmission in determining  
76 mortality in the community.<sup>11-13</sup> It is worth noting that school opening may impact on virus  
77 transmission because of the increase in public transport-related contacts and other non-school  
78 activities, not only through contacts occurring in the classroom.

79 In our first study conducted between 1 September and 15 October 2020, non-negligible secondary  
80 attack rates were detected, especially in secondary schools. After this first report, several changes  
81 occurred that could have influenced the risk of transmission and its control in schools.<sup>14</sup> Starting  
82 from 27 November 2020, the local health authority improved contact tracing protocols and  
83 introduced immediate molecular tests for all contacts, whether symptomatic or asymptomatic, at  
84 the beginning of quarantine, with the aim of identifying all possible sources of infection in

85 asymptomatic contacts, i.e., backward tracing (figure 1). Policies to reduce crowding especially in  
86 high schools were introduced (reducing in-class time by 25% to 50%) as were several short closures  
87 in the periods of highest incidence (figure 2). Finally, at the end of December 2020, the Alpha  
88 variant started to circulate in our province, becoming predominant in February 2021.<sup>15</sup>

89 In this study we present the results of comprehensive epidemiological investigations conducted from  
90 school reopening in September 2020 until the end of March 2021. Our aim was to quantify the risk  
91 of infection transmission in the school setting by type of school, characteristics of the index case and  
92 calendar period in the Reggio Emilia province by analysing surveillance data about all cases who had  
93 contacts in the school setting. The second aim was to estimate the promptness of contact tracing.

## 94 **Methods**

### 95 *Setting*

96 There are approximately 95,000 inhabitants from 6 months-old to 19-year-old that can attend  
97 infant-toddler centres (ages 0-3 years), preschools (ages 3-5), primary schools (ages 6-10), middle  
98 schools (ages 11-13) and high schools (ages 14-19), and about 12,000 teachers/ school staff  
99 members in Reggio Emilia province (531,751 inhabitants, Emilia Romagna, Northern Italy). During  
100 the study period, there were two peaks of infections: in November 2020 and in February/March  
101 2021 (figure 2). After the school reopening on 1 September 2020 for remedial courses and on 15  
102 September 2020 for the regular school year, in-class learning was in place until 26 October 2020,  
103 when most high schools moved to remote learning for at least 75% of scheduled lessons. In addition,  
104 because of the to the high circulation of the virus, the Christmas school holidays were extended to  
105 the second week of January, i.e., from 20 December to 11/15 January. Another lockdown led to the  
106 closing of schools on 3 March 2021 (figure 2). Only infant-toddler centres and preschools, schools  
107 that requires laboratory work and schools with pupils with disabilities or special needs continued in-  
108 class didactic activities.

109 *Design*

110 An analysis of population-based surveillance data was conducted including all consecutive positive  
111 cases confirmed with RT-PCR for SARS-COV-2 infection between 1 September 2020 and 4 April 2021  
112 in Reggio Emilia province that led to an epidemiological investigation among children and  
113 adolescents (0–19 years) who may have had exposure or contact with positive cases at school. Given  
114 that reporting positivity of even one child led to a field investigation, contact tracing and, in some  
115 cases, quarantine measures, all cases were included, regardless of the presence of an outbreak or  
116 not. We excluded cases that occurred among children not attending schools in the period  
117 investigated for contact tracing, i.e., in the period starting 48 h before symptom onset, and for  
118 asymptomatic cases, 48 h before diagnosis or 48 h after contact with a certain case, whichever  
119 occurred first.

120 *Control measures*

121 When a case occurred in primary and secondary schools, in-class activities were usually suspended,  
122 but quarantine was not mandatory if all physical distancing measures were respected (sufficient  
123 distance in the classroom, physical distance during all activities and utilization of face masks). All  
124 students and school personnel were asked to perform a swab, with an appointment scheduled as  
125 early as possible and communicated to the parents by means of a text message. If at least one  
126 secondary case was found, quarantine was mandatory for all students in that class. For all close  
127 contacts identified during the epidemiological investigation, a 10-day quarantine and an exit  
128 negative test were required. In the infant-toddler and preschool settings, both the teachers and  
129 children were considered close contacts if they had had contact with a case at school 48h before  
130 symptom onset or a positive swab, in which case they were subjected to quarantine. In some cases,  
131 based on the surveillance team's evaluation, the entire school was closed. Teachers were never  
132 quarantined for school contacts, except if they taught in an infant-toddler centre or preschool.

133 Other control measures have been described more in detail elsewhere<sup>14</sup>; the major changes  
134 occurring during the study period are described in figure 1.

135 *Outcome definition and variables of interest*

136 The main outcome was the secondary transmission rate. Overall attack rates were calculated by  
137 dividing the number of cases by the population at risk, i.e., classmates, teachers and staff, who had  
138 had close contact with the index case in a period starting from 48h before symptom onset of the  
139 symptomatic index case and, for asymptomatic cases, 48h before diagnosis or 48h after contact with  
140 a confirmed case, whichever occurred first. Mean attack rate was calculated as the mean value of all  
141 class-level transmissions.

142 A classroom cluster was defined as the presence of two or more positive students or teachers/staff  
143 members in the same class.

144 In this analysis we consider each single case or outbreak within a class as one statistical unit. For  
145 each class an index case was identified, i.e., the first case who tested positive (considering the date  
146 the swab was done). If more than one case in a class tested positive on the same day, the one with  
147 the earliest symptom onset was considered the index case. The same class can be included more  
148 than once because it may have been involved in more than one investigation during the study  
149 period.

150 When more than one class was included in a between-class transmission or there was a single index  
151 case for more than one class (usually, but not only, when the index case was a teacher), this was  
152 considered a school cluster.

153 If a classmate was already in isolation prior to symptom onset or swab positivity of the index case,  
154 due to contact with a positive person or re-entry from abroad, he/she was excluded from the  
155 denominator. Any student or staff who refused to perform a swab was excluded from the  
156 denominator. Cluster characteristics are reported; instead, information on the characteristics of

157 cases diagnosed outside the province or that were identified during some experimental screening  
158 programme (2 classes) are missing.

159 Index cases were classified as student or teacher/staff and according to whether the case had a  
160 known contact outside the school setting (household, social activity, sport activity, not identified,  
161 and other/unspecified). The classes were classified according to the type of school (infant-toddler  
162 centre and preschool, primary school, lower secondary school, upper secondary school) and whether  
163 they were part of a multiclass cluster.

164 Delay in diagnosis of the index case, computed only for symptomatic cases, as the number of days  
165 between symptom onset and the date of swab positivity. Delay in contact tracing was computed as  
166 the time from swab positivity of the index case to the date on which the swab for (the majority of)  
167 classmates was scheduled.

168 Descriptive statistic was used to analyse and present the data. Data were analysed using Microsoft  
169 Excel and Stata v.13.1 (Statacorp, Tx).

#### 170 *Ethical statement*

171 The study was approved by the Area Vasta Emilia Nord Ethics Committee (no. 2020/0045199). The  
172 Ethics Committee authorised the use of subject data even in the absence of consent for people that  
173 could not be reached, if every reasonable effort had been made to contact that subject.

#### 174 **Results**

175 A total of 1213 student and 391 teacher/staff index cases were identified, corresponding to 1882  
176 investigated classes, because some index cases, particularly teachers, had contacts in more than one  
177 class. A total of 43,792 swabs were requested for contact tracing in these classes; 43,214 (98.7%)  
178 were performed (table 1). The number of students and teachers/staff involved in contact tracing was  
179 about slightly less than half of the number of total resident students and teachers/staff in the  
180 province. However, this does not mean that epidemiological investigations involved this proportion

181 of the school population, because some classes might have been involved in more than one  
182 investigation during the study period. Teacher index cases were more frequent in preschools and  
183 primary schools than in secondary schools.

184 Student index cases were identified in 56.5% of cases as a contact of other cases, the vast majority  
185 of which were within the same household (46.5%); a possible source of infection was identified for  
186 only 26.6% of teacher index cases (Table 1).

187 Secondary transmission occurred in less than 40% of classes, and the overall attack rate was 3.9%  
188 (95% CI 3.8-4.1%), 3.5% (95% CI 3.3-3.7%) for student index cases and 4.9% (95% CI 4.5-5.3%) for  
189 teacher index cases (Table 1). The attack rate over the study period was 4.8% in September and  
190 October, 2.6% in November, 3.9% in December and 4% from January to April (Table 2). The attack  
191 rate was similar in all types of schools (Table 3).

192 The mean delay in testing was 6 days in student index cases and 4.8 in teachers (Table 1); this did  
193 not change over the study period, except for a slight increase in December, and was similar across  
194 types of schools (Table 3). On the contrary, the delay in contact tracing decreased from December  
195 2020 on, from about 7 days to 3 days (Table 2), not showing any differences between type of index  
196 case and type of school (Table 3).

## 197 **Discussion**

198 We confirm a modest secondary attack rate in schools, as already observed in previous studies.<sup>16-19</sup>  
199 Secondary cases occurred in about 40% of classes that were exposed to an infected classmate or  
200 teacher, and the overall attack rate was about 4%. Differently from our previous report<sup>14</sup> and other  
201 studies reporting data on school cluster investigations,<sup>19</sup> the attack rate was similar in preschools,  
202 primary schools and secondary schools. In fact, compared with the first two months of the study  
203 period,<sup>14</sup> the attack rate increased in preschools from almost no transmission to 4%, while it  
204 remained stable in secondary schools. It must be considered that remote learning and periodic



205 closures were implemented much more frequently in secondary schools, starting from 26 October  
206 2020. Furthermore, an increase in the secondary case attack rate starting from late  
207 December/January was expected because the spread of the Alpha variant, which is more infectious  
208 than the previously circulating variants,<sup>20</sup> started in that period in our region.<sup>15</sup>

209 Surprisingly, the difference in attack rate between classes where the index case was a student and  
210 those where the index case was a teacher was also small, despite the different kind of interactions  
211 and length of exposure of student-student contact and teacher-student contacts in the school  
212 setting. Unfortunately, we do not have any analytical information to define the quality and the  
213 duration of interactions between index cases and contacts.

214 The effect of changes in contact tracing strategies introduced mainly after the second wave of the  
215 pandemic, i.e., at the end of November 2020, was appreciable in the reduction in the delay in  
216 contact tracing and in the increase in the proportion of index cases for which a contact, particularly a  
217 contact in their household, was known. Indeed, a higher proportion of school investigations with a  
218 known link to household clusters was precisely the anticipated effect of introducing immediate  
219 testing of all asymptomatic contacts for all incident cases in the community, because this backward  
220 tracing made it possible to identify asymptomatic or paucisymptomatic students and to link them to  
221 their school contacts.

#### 222 *Limitations and strengths*

223 The main limitation of this study is that any observed association between changes in secondary  
224 attack rate and school or index case characteristics and especially actions implemented during the  
225 study period could be confounded by other factors that we could not measure. Among these, the  
226 most important was the spread of the Alpha variant, which probably started in our region around  
227 Christmas and which became the dominant circulating variant in February. Unfortunately, as very  
228 few cases were sequenced in Italy in that period,<sup>15</sup> we cannot determine which clusters were due to  
229 the Alpha variant. Other variables that were missing or difficult to standardize were the duration and

230 intensity of contacts between the index case and other classmates and the control measures each  
231 school independently put in place both before the occurrence of the case and during the outbreak.  
232 The main strength of the study is its population-based nature; it included all cases for a which a  
233 school contact or exposure was identified. For an analysis of routine surveillance data, the  
234 completeness of field investigations is surprisingly high; only a few classes were not characterized,  
235 and very few classmates refused to be tested. Each outbreak in each school was investigated and re-  
236 checked for plausibility by the investigation team, thereby partially overcoming the shortcomings of  
237 cross-sectional, retrospective and self-reported studies.

### 238 **Conclusions**

239 Overall, we confirmed a moderate risk of secondary transmission in the school setting (4.1% vs 3.2%  
240 in the previous study up to 15th October 2020), similar across all types of schools. The attack rate  
241 was also stable during the study period, despite the fact that the Alpha variant, which is much more  
242 infectious than the previously circulating variants, became predominant in the last included months.  
243 The promptness of contact tracing increased over the study period, reducing the time from index  
244 case identification to testing of contacts from 7 to 3 days, as well the ability to identify possible  
245 sources of infection in the index case.

### 246 **Acknowledgements**

247 We thank all the Public Health Department officers and COVID-19 reference persons in the schools  
248 that collaborated in the investigations.

249 We thank Jacqueline M. Costa for the English language editing.

### 250 **Conflict of interest**

251 None declared.

### 252 **Authors' contributions**

253 PGR, EL, MV and PP designed the study. EL, MC, SC, EB, DP, FV and EB contributed to the collection  
254 and management of the data. OD and LB analysed the data. OD and PGR interpreted the data and  
255 wrote the manuscript. AMU contributed to data analysis and interpretation of results. All authors  
256 revised the manuscript and approved the final version.

## 257 **Funding**

258 The study was conducted using exclusively institutional funds of the Azienda USL-IRCCS di Reggio  
259 Emilia. There was no external funding source for this study.

260

## 261 **What is already known on this topic**

- 262
- Closure of educational institutions was one of the preventive measures considered and  
263 often adopted during the pandemic.
  - The role of school contacts in the spread of the virus as well the effectiveness of school  
264 closures in controlling the epidemic is still debated.
  - Potential effect of the more prompt (backward) contact tracing on secondary transmission in  
265 educational setting has not been evaluated.
- 266
- 267

## 268 **What this study adds**

- 269
- Risk of transmission in educational setting is moderate with stable attack rates over time  
270 and by type of school.
  - Secondary attack rate is slightly higher if index case is a teacher.
  - The tracing delay has halved after introducing the backward contact tracing, while ability to  
271 identify possible sources of infection in the index case increased.
- 272
- 273

274

275

276 **References**

- 277 1. Dong E, Du H, Gardner L. An interactive web-based dashboard to track COVID-19 in real time.  
278 *Lancet Infect Dis.* 2020;20(5):533-534. doi: 10.1016/S1473-3099(20)30120-1.
- 279 2. Viner RM, Mytton OT, Bonnel C, Mellendez-Torres JG, Ward J, Hudson L, et al. Susceptibility to  
280 SARS-CoV-2 Infection Among Children and Adolescents Compared With Adults. A Systematic Review  
281 and Meta-analysis. *JAMA Pediatr.* 2021;175(2):143-156. Doi: 10.1001/jamapediatrics.2020.4573
- 282 3. Gaythorpe, KAM, Bhatia S, Mangal T, et al. Children’s role in the COVID-19 pandemic: a systematic  
283 review of early surveillance data on susceptibility, severity, and transmissibility. 2021;11(1):13903.  
284 doi: 10.1038/s41598-021-92500-9.
- 285 4. Haug N, Geyrhofer L, Londei A, Dervic E, Desvars-Larrive A, Loreto V, Pinior B, Thurner S, Klimek P.  
286 Ranking the effectiveness of worldwide COVID-19 government interventions. *Nat Hum Behav.*  
287 2020;4(12):1303-1312. doi: 10.1038/s41562-020-01009-0.
- 288 5. Head JR, Andrejko K, Cheng Q, et al. The effect of school closures and reopening strategies on  
289 COVID-19 infection dynamics in the San Francisco Bay Area: a cross-sectional survey and modeling  
290 analysis. *medRxiv [Preprint].* 2020. doi: 10.1101/2020.08.06.20169797.
- 291 6. Keeling MJ, Tildesley MJ, Atkins BD, et al. The impact of school reopening on the spread of COVID-  
292 19 in England. *Philos Trans R Soc Lond B Biol Sci.* 2021;376(1829):20200261 doi:  
293 10.1098/rstb.2020.0261.
- 294 7. Landeros A, Ji X, Lange K, et al. An examination of school reopening strategies during the SARS-  
295 CoV-2 pandemic. *PLoS One.* 2021;16(5):e0251242. doi: 10.1371/journal.pone.0251242.
- 296 8. Walsh S, Chowdhury A, Russell S, et al. Do school closures reduce community transmission of  
297 COVID-19? A systematic review of observational studies *MedRxiv.* 2021. doi:  
298 <https://doi.org/10.1101/2021.01.02.21249146>.

- 299 9. Courtemanche C, Garuccio J, Le A, et al. Strong Social Distancing Measures In The United States  
300 Reduced The COVID-19 Growth Rate. *Health Aff (Millwood)* 2020; 39: 1237–46. doi:  
301 10.1377/hlthaff.2020.00608.
- 302 10. Hsiang S, Allen D, Annan-Phan S, et al. The effect of large-scale anti-contagion policies on the  
303 COVID-19 pandemic. *Nature* 2020; 584: 262–7. doi: 10.1038/s41586-020-2404-8.
- 304 11. Ertem Z, Schechter-Perkins E, Oster E, et al. The Impact of School Opening Model on SARS-CoV-2  
305 Community Incidence and Mortality: A Nationwide Cohort Study. *Res Sq [Preprint]*. 2021 Jul  
306 15:rs.3.rs-712725. doi: 10.21203/rs.3.rs-712725/v1.
- 307 12. Forbes H, Morton CE, Bacon S, et al. Association between living with children and outcomes from  
308 covid-19: OpenSAFELY cohort study of 12 million adults in England. *BMJ*. 2021;372:n628. doi:  
309 10.1136/bmj.n628.
- 310 13. Marziano V, Guzzetta G, Rondinone BM, et al. Retrospective analysis of the Italian exit strategy  
311 from COVID-19 lockdown. *Proc Natl Acad Sci U S A*. 2021;118(4):e2019617118. doi:  
312 10.1073/pnas.2019617118.
- 313 14. Larosa E, Djuric O, Cassinadri M, et al. Secondary transmission of COVID-19 in preschool and  
314 school settings in northern Italy after their reopening in September 2020: a population-based study.  
315 *Euro Surveill*. 2020;25(49):2001911. doi: 10.2807/1560-7917.ES.2020.25.49.2001911.
- 316 15. Istituto Superiore di Sanità. Prevalenza e distribuzione delle varianti di SARS-CoV-2 di interesse  
317 per la sanità pubblica in Italia. Rapporto n. 5 del 23 luglio 2021. July 2021. [Italian] Available at:  
318 [https://www.epicentro.iss.it/coronavirus/pdf/sars-cov-2-monitoraggio-varianti-rapporti-periodici-](https://www.epicentro.iss.it/coronavirus/pdf/sars-cov-2-monitoraggio-varianti-rapporti-periodici-23-luglio-2021.pdf)  
319 [23-luglio-2021.pdf](https://www.epicentro.iss.it/coronavirus/pdf/sars-cov-2-monitoraggio-varianti-rapporti-periodici-23-luglio-2021.pdf)
- 320 16. Ehrhardt J, Ekinci A, Krehl H, Meincke M, Finci I, Klein J, et al. Transmission of SARS-CoV-2 in  
321 children aged 0 to 19 years in childcare facilities and schools after their reopening in May 2020,  
322 Baden-Württemberg, Germany. *Euro Surveill*. 2020;25(36):2001587. doi: 10.2807/1560-  
323 7917.ES.2020.25.36.2001587

- 324 17. Macartney K, Quinn HE, Pillsbury AJ, Koirala A, Deng L, Winkler N, et al. Transmission of SARS-  
325 CoV-2 in Australian educational settings: a prospective cohort study. *Lancet Child Adolesc Health*.  
326 2020;4(11):807-816. doi: 10.1016/S2352-4642(20)30251-0
- 327 18. Yoon Y, Kim KR, Park H, et al. Stepwise school opening online and off-line and an impact on the  
328 epidemiology of COVID-19 in the pediatric population. *MedRxiv*.2020; (Preprint). doi:  
329 10.1101/2020.08.03.20165589.
- 330 19. Aiano F, Mensah AA, McOwat K, Obi C, Vusirikala A, Powell AA, Flood J, Bosowski J, Letley L,  
331 Jones S, Amin-Chowdhury Z, Lacy J, Hayden I, Ismail SA, Ramsay ME, Ladhani SN, Saliba V. COVID-19  
332 outbreaks following full reopening of primary and secondary schools in England: Cross-sectional  
333 national surveillance, November 2020. *Lancet Reg Health Eur*. 2021 Jul;6:100120. doi:  
334 10.1016/j.lanepe.2021.100120. Epub 2021 May 19.
- 335 20. Davies NG, Abbott S, Barnard RC, et al. Estimated transmissibility and impact of SARS-CoV-2  
336 lineage B.1.1.7 in England. *Science*. 2021;372(6538):eabg3055. doi: 10.1126/science.abg3055.

337

### 338 **Figure legends**

339 Figure 1. Timeline of the major changes in regulations and recommendations for management of  
340 COVID-19 cases in educational settings in Reggio Emilia province

341 Figure 2. Weekly notification rates of new COVID-19 cases per 100,000 inhabitants aged 0-19 years,  
342 by age class, Reggio Emilia province, 1 September 2020 – 31 March 2021. In the graph the main  
343 changes in school opening and closure are also reported, and (in red) the proportion of Alpha variant  
344 among sequenced cases as reported by the Italian National Institute of Health.

345

## Tables

Table 1. Characteristics of the field investigation in 1884\* classes for which a school contact with a COVID-19 case was suspected, by type of index case. Reggio Emilia, September 2020-March 2021

|                                                   | Student     |           | Teacher    |           | Total*      |           |
|---------------------------------------------------|-------------|-----------|------------|-----------|-------------|-----------|
| <b>N of classes</b>                               | <b>1224</b> |           | <b>658</b> |           | <b>1882</b> |           |
| Type of school, n (%)                             |             |           |            |           |             |           |
| Infant-toddler centre                             | 194         | 15.9      | 156        | 23.7      | 350         | 18.6      |
| Primary school                                    | 341         | 27.8      | 197        | 29.9      | 538         | 28.6      |
| Middle school                                     | 310         | 25.3      | 186        | 28.3      | 496         | 26.3      |
| High school                                       | 366         | 29.9      | 112        | 17.0      | 478         | 25.4      |
| Other educational services                        | 13          | 1.1       | 7          | 1.1       | 20          | 1.1       |
| Classes with secondary transmission, n (%)        | 471         | 38.5      | 255        | 38.7      | 726         | 38.6      |
| Classes that were part of a school cluster, n (%) | 105         | 8.6       | 412        | 62.6      | 517         | 27.5      |
| School clusters, n (%)                            | 51          |           | 142        |           | 193         |           |
| Testing delay - days mean (SD)                    | 6.1         | 4.8       | 4.8        | 4.2       | 5.6         | 4.6       |
| Tracing delay - days mean (SD)                    | 4.3         | 3.3       | 4.1        | 2.9       | 4.2         | 3.2       |
| Number of contacts                                | 30,184      |           | 13,608     |           | 43,792      |           |
| Number of tested contacts                         | 29,802      |           | 13,412     |           | 43,214      |           |
| N of secondary cases                              | 1047        |           | 658        |           | 1705        |           |
| Overall attack rate, % (95% CI) <sup>***</sup>    | 3.5         | 3.3 - 3.7 | 4.9        | 4.5 - 5.3 | 3.9         | 3.8 - 4.1 |
| Mean attack rate <sup>^**</sup>                   | 3.6         | 3.2-4.1   | 5.0        | 4.2-5.8   | 4.1         | 3.7-4.5   |
| <b>N of index cases</b>                           | <b>1213</b> |           | <b>391</b> |           | <b>1604</b> |           |
| Possible source of infection of index case, n (%) | 686         | 56.6      | 104        | 26.6      | 790         | 49.2      |
| Household outbreak                                | 564         | 46.5      | 50         | 12.8      | 614         | 38.3      |
| Social contact                                    | 19          | 1.6       | 7          | 1.8       | 26          | 1.6       |
| Sport contact                                     | 18          | 1.5       | 0          | 0.0       | 18          | 1.1       |
| Someone's contact                                 | 85          | 7.0       | 47         | 12.0      | 132         | 8.2       |
| No contact reported                               | 527         | 43.4      | 287        | 73.4      | 814         | 50.8      |

\* In two classes there were no index cases due to screening

\*\* Swabs not performed were excluded, as were 11 classes with unknown number of contacts

\* Calculated by dividing the overall number secondary cases by the number of tested contacts

^ Mean of all classroom-level attack rates

Table 2. Characteristics of the field investigation in 1884 classes for which a school contact with a COVID-19 cases was suspected, by calendar period. Reggio Emilia, September 2020-March 2021

|                                                  | September+October |           | November   |           | December   |           | January+February+March+April* |           |
|--------------------------------------------------|-------------------|-----------|------------|-----------|------------|-----------|-------------------------------|-----------|
| <b>N of classes</b>                              | <b>248</b>        |           | <b>263</b> |           | <b>316</b> |           | <b>1057</b>                   |           |
| Type of school, n (%)                            |                   |           |            |           |            |           |                               |           |
| Infant-toddler centre                            | 39                | 15.7      | 72         | 27.4      | 53         | 16.8      | 186                           | 17.6      |
| Primary school                                   | 46                | 18.6      | 89         | 33.8      | 113        | 35.8      | 292                           | 27.6      |
| Middle school                                    | 52                | 21.0      | 82         | 31.2      | 104        | 32.9      | 258                           | 24.4      |
| High school                                      | 111               | 44.8      | 18         | 6.8       | 42         | 13.3      | 307                           | 29.1      |
| Other educational services                       | 0                 | 0.0       | 2          | 0.8       | 4          | 1.3       | 14                            | 1.3       |
| Classes with secondary transmission, n (%)       | 106               | 43.6      | 86         | 33.0      | 124        | 40.3      | 411                           | 39.1      |
| Classes that are part of a school cluster, n (%) | 55                | 22.2      | 73         | 27.8      | 112        | 35.4      | 277                           | 26.2      |
| N of school clusters                             | 22                |           | 27         |           | 37         |           | 107                           |           |
| <b>N of index cases</b>                          | <b>226</b>        |           | <b>220</b> |           | <b>250</b> |           | <b>908</b>                    |           |
| Type of index case, n (%)                        |                   |           |            |           |            |           |                               |           |
| Teacher                                          | 38                | 16.8      | 75         | 34.1      | 72         | 28.8      | 206                           | 22.7      |
| Student                                          | 188               | 83.2      | 145        | 65.9      | 178        | 71.2      | 702                           | 77.3      |
| Possible source of infection of index case       |                   |           |            |           |            |           |                               |           |
| Household outbreak                               | 59                | 26.1      | 45         | 20.5      | 113        | 45.2      | 397                           | 43.7      |
| Social contact                                   | 7                 | 3.1       | 0          | 0.0       | 5          | 2.0       | 14                            | 1.5       |
| Sport contact                                    | 7                 | 3.1       | 0          | 0.0       | 0          | 0.0       | 11                            | 1.2       |
| Unidentifiable contact                           | 27                | 11.9      | 9          | 4.1       | 20         | 8.0       | 76                            | 8.4       |
| No contact reported                              | 126               | 55.8      | 166        | 75.5      | 112        | 44.8      | 410                           | 45.2      |
| Number of contacts                               | 6,327             |           | 6,279      |           | 6,860      |           | 24,314                        |           |
| Number of tested contacts                        | 6,252             |           | 5,964      |           | 6,827      |           | 24,204                        |           |
| N of secondary cases                             | 302               |           | 156        |           | 264        |           | 984                           |           |
| Overall attack rate, % (95% CI) <sup>***</sup>   | 4.8               | 4.3 - 5.4 | 2.6        | 2.2 - 3.1 | 3.9        | 3.4 - 4.4 | 4.1                           | 3.8 - 4.3 |
| Mean attack rate <sup>^**</sup>                  | 4.8               | 3.8-5.9   | 2.8        | 2.0-3.5   | 4.2        | 3.2-5.2   | 4.2                           | 3.7-4.8   |
| Testing delay - days mean (SD)                   | 5.7 (4.3)         |           | 5.8 (3.8)  |           | 7.0 (5.1)  |           | 5.2 (4.6)                     |           |



---

|                                |           |           |           |           |
|--------------------------------|-----------|-----------|-----------|-----------|
| Tracing delay - days mean (SD) | 7.4 (3.8) | 7.4 (3.9) | 3.6 (1.7) | 2.9 (1.9) |
|--------------------------------|-----------|-----------|-----------|-----------|

---

\*Until 4 April 2021

\*\*Swabs not performed were excluded, as were 11 classes without known number of contacts

‡ Calculated by dividing overall secondary cases by the number of tested contacts

^ Mean of all classroom-level attack rates

Table 3. Characteristics of the field investigation in 1884 classes for which a school contact with a Covid-19 cases was suspected, by type of school. Reggio Emilia, September 2020-March 2021

|                                              | Infant-toddler centre |           | Primary school |           | Middle school |           | High school |           | Other educational services |           |
|----------------------------------------------|-----------------------|-----------|----------------|-----------|---------------|-----------|-------------|-----------|----------------------------|-----------|
| <b>N of classes</b>                          | <b>350</b>            |           | <b>540</b>     |           | <b>496</b>    |           | <b>478</b>  |           | <b>20</b>                  |           |
| Classes with secondary transmission          | 131                   | 37.4      | 216            | 40.0      | 173           | 34.9      | 202         | 42.3      | 5                          | 25.0      |
| Classes that were part of a school cluster   | 25                    | 7.1       | 162            | 30.0      | 207           | 41.7      | 116         | 24.3      | 7                          | 35.0      |
| N of school clusters                         | 10                    |           | 70             |           | 68            |           | 43          |           | 2                          |           |
| <b>N of index cases</b>                      | <b>338</b>            |           | <b>466</b>     |           | <b>370</b>    |           | <b>415</b>  |           | <b>15</b>                  |           |
| Type of index case, n (%)                    |                       |           |                |           |               |           |             |           |                            |           |
| Teacher                                      | 144                   | 42.6      | 126            | 27.0      | 66            | 17.8      | 51          | 12.3      | 4                          | 26.7      |
| Student                                      | 194                   | 57.4      | 340            | 73.0      | 304           | 82.2      | 364         | 87.7      | 11                         | 73.3      |
| Number of contacts                           | 7,767                 |           | 11,709         |           | 12,106        |           | 11,936      |           | 306                        |           |
| Number of tested contacts                    | 7,652                 |           | 11,575         |           | 11,923        |           | 11,799      |           | 298                        |           |
| N of secondary cases                         | 349                   |           | 553            |           | 386           |           | 409         |           | 9                          |           |
| Overall attack rate, % (95% CI) <sup>‡</sup> | 4.6                   | 4.1 - 5.1 | 4.8            | 4.4 - 5.2 | 3.2           | 2.9 - 3.6 | 3.5         | 3.1 - 3.8 | 3.0                        | 1.4 - 5.7 |
| Mean attack rate <sup>^</sup>                | 4.8                   | 3.7-5.9   | 5.0            | 4.1-5.9   | 3.4           | 2.8-4.0   | 3.3         | 2.8-3.9   | 2.1                        | 0.3-4.5   |
| Testing delay - days mean (SD)               | 6.0                   | 4.6       | 5.8            | 4.9       | 5.4           | 4.6       | 5.4         | 4.3       | 6.7                        | 5.1       |
| Tracing delay - days mean (SD)               | 4.4                   | 3.5       | 4.1            | 3.1       | 4.1           | 3.3       | 4.4         | 3.0       | 3.3                        | 2.3       |

\*Swabs not performed were excluded, as were 11 classes without known number of contacts

‡ Calculated by dividing the overall number of secondary cases by the number of tested contacts

<sup>^</sup> Mean of all classroom-level attack rates

Figure 1

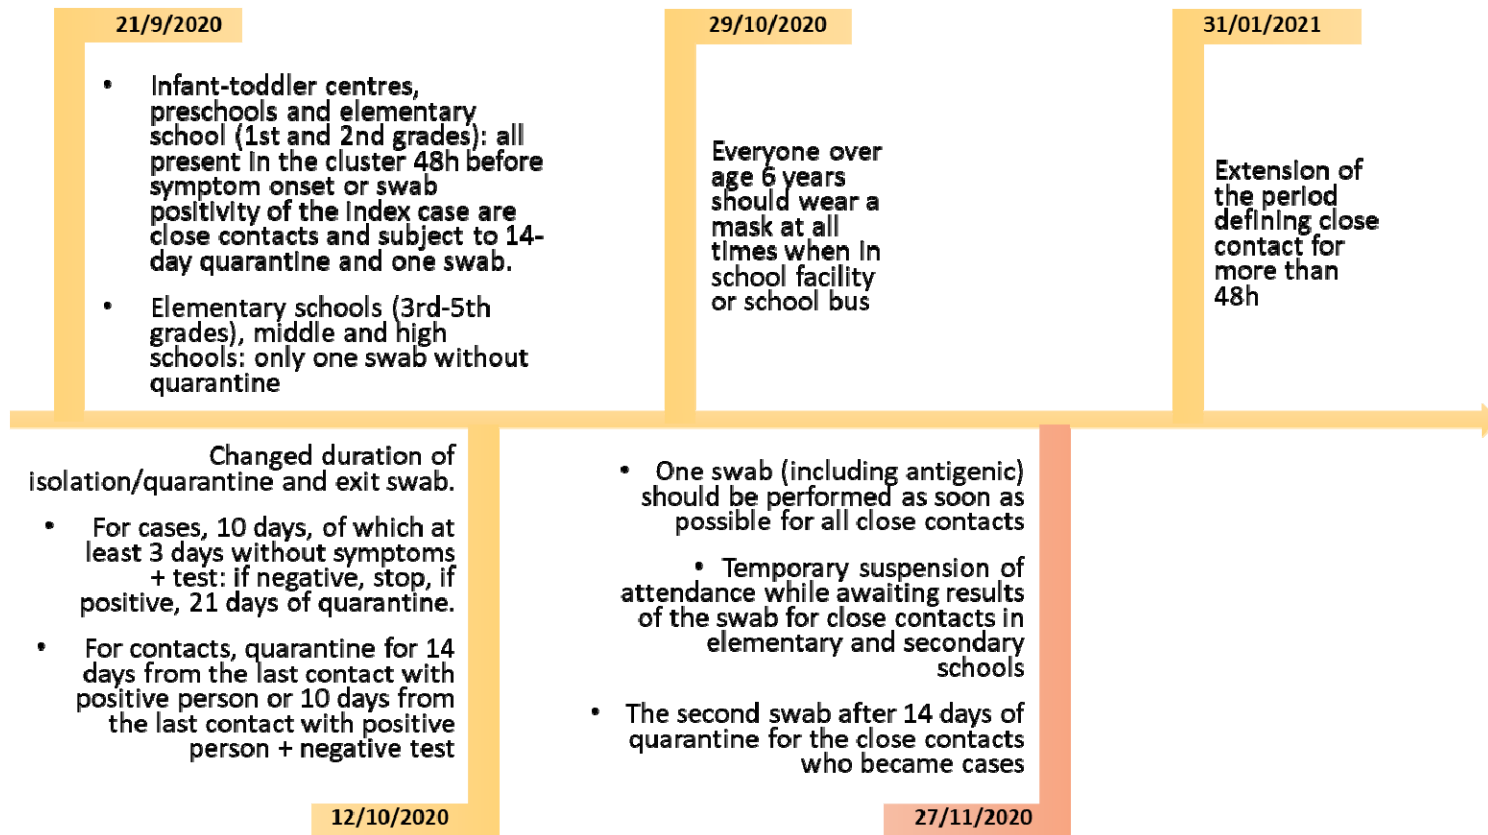

Figure 2

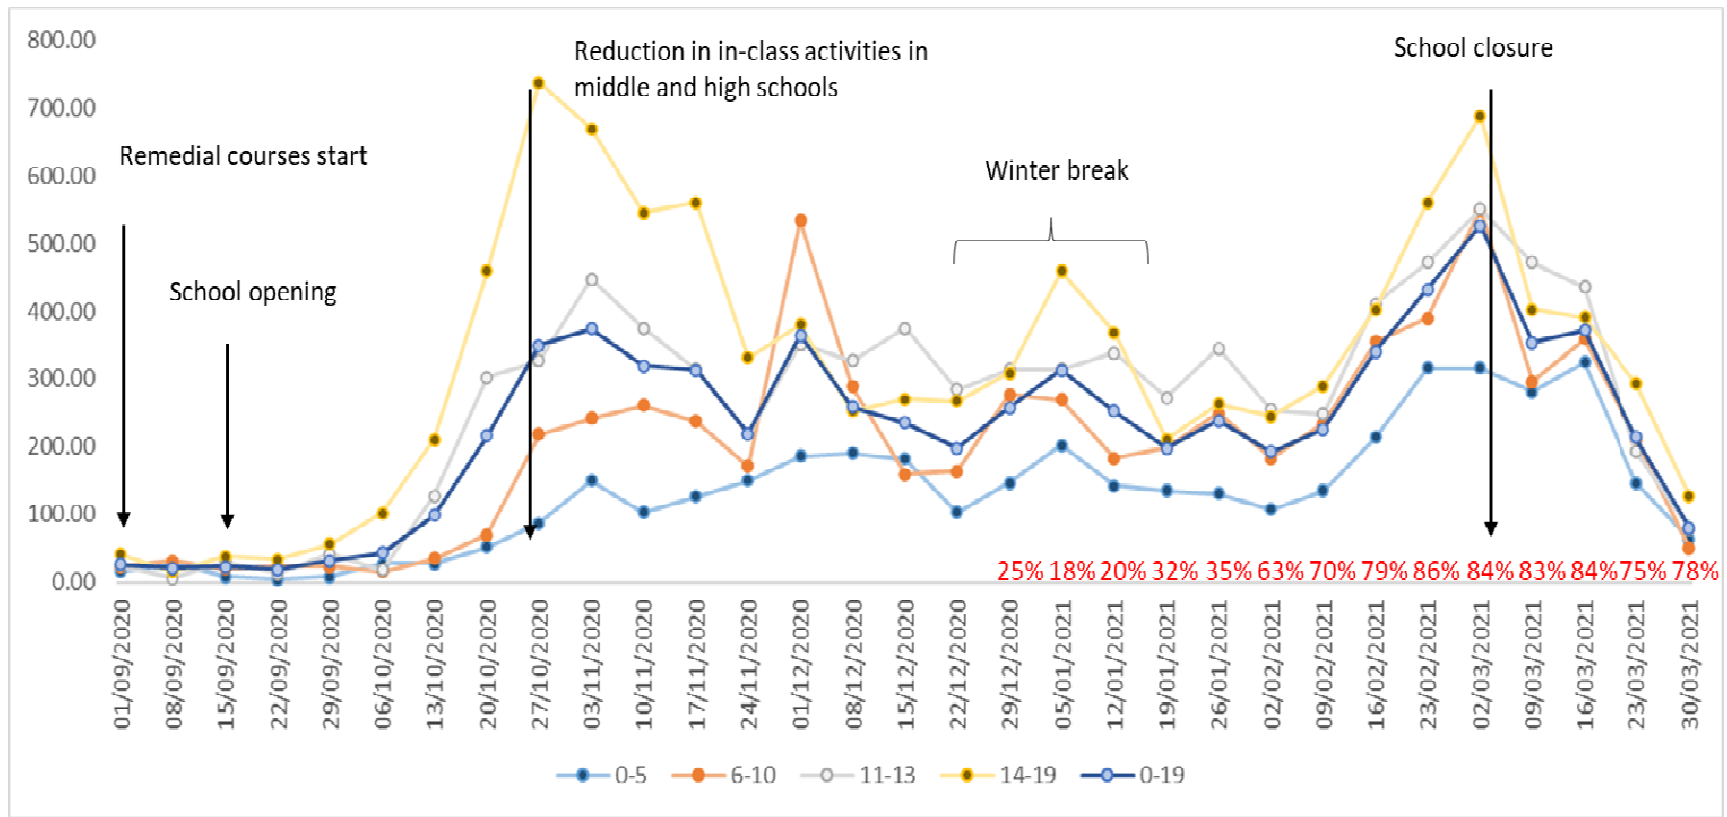

Source: https://medrxiv.org/content/medrxiv/early/2021/11/09/2021.09.03.21263061.full.pdf
